# Supplementary material
Source: PubMed Central journal article supplement (PMC2654176)
Supplement: NIHMS86639-supplement-1_si_001.pdf [file NIHMS86639-supplement-1_si_001.pdf]

## IRMPD Spectroscopy Shows That AGG Forms an Oxazolone $b_2^+$ Ion

Sung Hwan Yoon,<sup>§</sup> Julia Chamot-Rooke,<sup>†</sup> Brittany R. Perkins,<sup>§</sup> Amy E. Hilderbrand,<sup>§</sup> John C. Poutsma,<sup>‡</sup> Vicki H. Wysocki<sup>†,§</sup>

<sup>§</sup>Department of Chemistry, University of Arizona, Tucson, Arizona, 85721, Laboratoire des Mécanismes Réactionnels, <sup>†</sup>Department of Chemistry, Ecole Polytechnique, CNRS, 91128 Palaiseau, France, <sup>‡</sup>Department of Chemistry, The College of William and Mary, Williamsburg, Virginia 23187

RECEIVED DATE (automatically inserted by publisher); vwysoc@email.arizona.edu

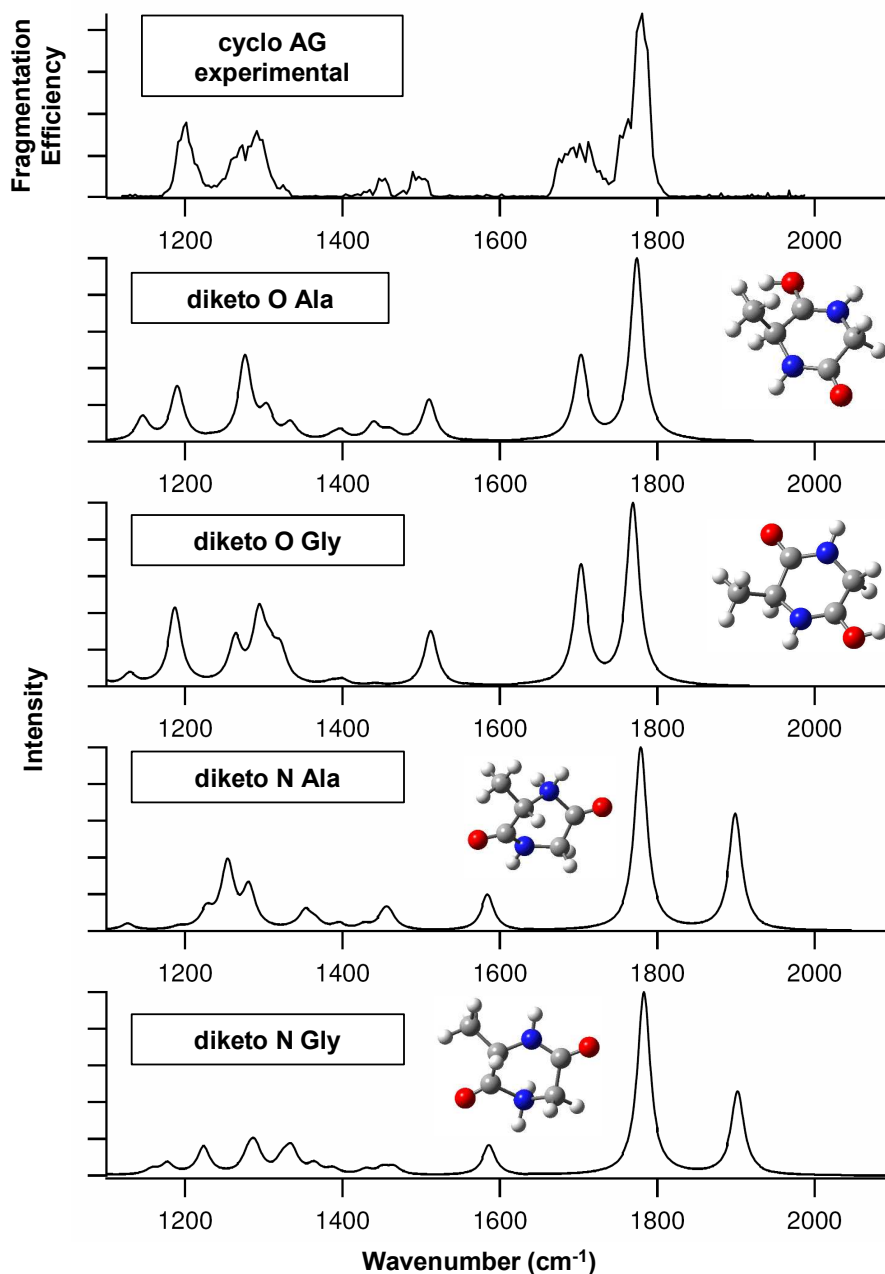

Figure S1: IRMPD spectrum of cAG plotted as fragmentation efficiency for formation of the most abundant fragment ion and calculated spectra of all stable diketopiperazine isomers.

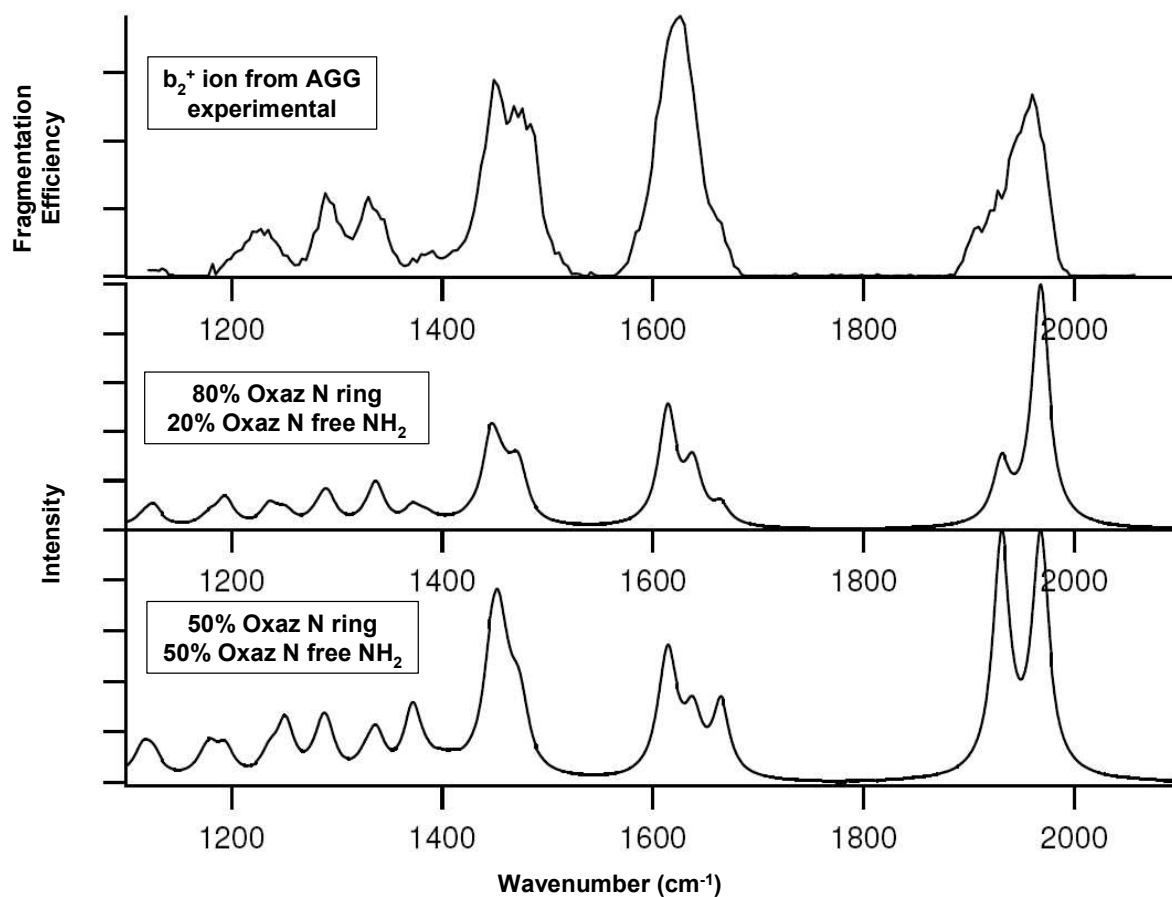

Figure S2: IRMPD spectrum of AGG  $b_2^+$  ion plotted as fragmentation efficiency for formation of the most abundant fragment ion and calculated spectra. The middle panel is a combination of 80% oxazolone protonated on the ring nitrogen and 20% oxazolone protonated on the free  $NH_2$ . The bottom panel is a combination of 50% oxazolone protonated on the ring nitrogen and 50% oxazolone protonated on the free  $NH_2$ .

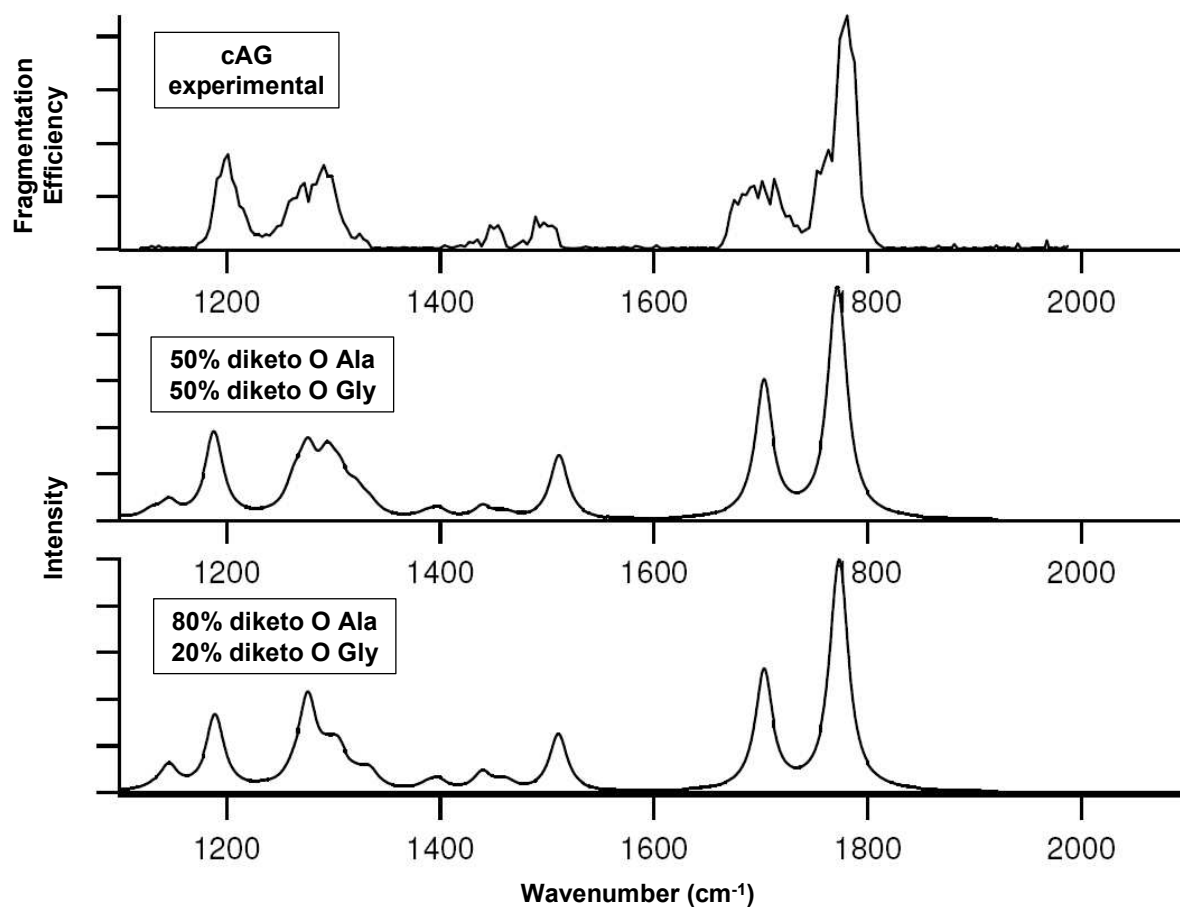

Figure S3: IRMPD spectrum of protonated cAG ion plotted as fragmentation efficiency for formation of the most abundant fragment ion and calculated spectra. The middle panel is a combination of 50% diketopiperazine protonated at the alanine amide oxygen and 50% diketopiperazine protonated at the glycine amide oxygen. The bottom panel is a combination of 80% diketopiperazine protonated at the alanine amide oxygen and 20% diketopiperazine protonated at the glycine amide oxygen.

**Further band assignments:**

For protonated cAG in Figure 1; the bands at  $1446\text{ cm}^{-1}$  is rocking modes of the methyl group;  $1284\text{ cm}^{-1}$  is produced by wagging motions of  $\text{CH}_2$ .

For  $\text{b}_2^+$  ion from protonated AGG in Figure 2; the bands at  $1471\text{ cm}^{-1}$  and  $1445\text{ cm}^{-1}$  are from scissoring mode of the methyl group (Oxaz N ring) and  $\text{NH}_3$  umbrella mode of oxazolone isomer protonated at free  $\text{NH}_2$  (Oxaz N free  $\text{NH}_2$ ). The band at  $1294\text{ cm}^{-1}$  is from wagging of  $\text{CH}_2$  in the ring, and the band at  $1239\text{ cm}^{-1}$  is related to twisting of  $\text{CH}_3$ .

**Full References**

(13) Gaussian 03, Revision D.01, M. J. Frisch, G. W. Trucks, H. B. Schlegel, G. E. Scuseria, M. A. Robb, J. R. Cheeseman, J. A. Montgomery, Jr., T. Vreven, K. N. Kudin, J. C. Burant, J. M. Millam, S. S. Iyengar, J. Tomasi, V. Barone, B. Mennucci, M. Cossi, G. Scalmani, N. Rega, G. A. Petersson, H. Nakatsuji, M. Hada, M. Ehara, K. Toyota, R. Fukuda, J. Hasegawa, M. Ishida, T. Nakajima, Y. Honda, O. Kitao, H. Nakai, M. Klene, X. Li, J. E. Knox, H. P. Hratchian, J. B. Cross, V. Bakken, C. Adamo, J. Jaramillo, R. Gomperts, R. E. Stratmann, O. Yazyev, A. J. Austin, R. Cammi, C. Pomelli, J. W. Ochterski, P. Y. Ayala, K. Morokuma, G. A. Voth, P. Salvador, J. J. Dannenberg, V. G. Zakrzewski, S. Dapprich, A. D. Daniels, M. C. Strain, O. Farkas, D. K. Malick, A. D. Rabuck, K. Raghavachari, J. B. Foresman, J. V. Ortiz, Q. Cui, A. G. Baboul, S. Clifford, J. Cioslowski, B. B. Stefanov, G. Liu, A. Liashenko, P. Piskorz, I. Komaromi, R. L. Martin, D. J. Fox, T. Keith, M. A. Al-Laham, C. Y. Peng, A. Nanayakkara, M. Challacombe, P. M. W. Gill, B. Johnson, W. Chen, M. W. Wong, C. Gonzalez, and J. A. Pople, Gaussian, Inc., Wallingford CT, 2004.
